# Supplementary material
Source: publisher site journal article supplement (https://www.dovepress.com/get_supplementary_file.php?f=352154.docx)
Supplement: Supplementary file 1 [file get_supplementary_file.php]

**Supplement materials**

**
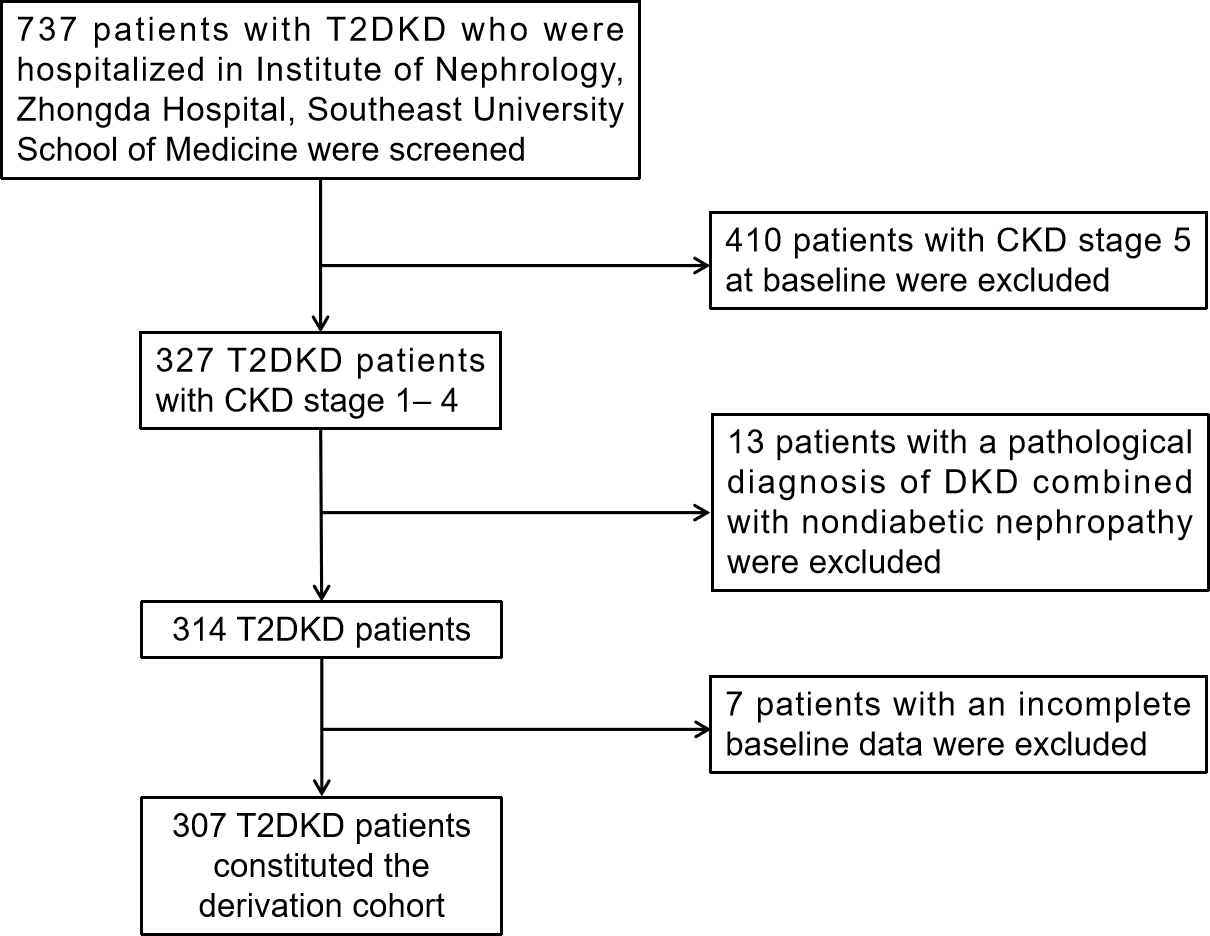
**

**Supplement Figure 1.** The detailed process for the selection of patients in the derivation cohort. Totally 737 T2DKD patients hospitalized in the Institute of Nephrology, Zhongda Hospital, Southeast University School of Medicine (baseline from June 2013 to June 2017) were screened for the derivation cohort. After excluding patients with CKD stage 5, nondiabetic kidney disease and incomplete baseline data, 307 patients were included as the derivation cohort. **Abbreviations:** T2DKD: type 2 diabetic kidney disease; CKD: chronic kidney disease.

**Supplement Table 1.** The HR value and corresponding score of each variable in the risk table

| Variable | HR | Score |
| --- | --- | --- |
| **Scr (µmol/L)** |  |  |
| ＜180（ref） |  |  |
| ≥180 | 2.74 | 4 |
| **Plasma AlB (g/L)** |  |  |
| ≥35（ref） |  |  |
| [25,35) | 2.12 | 2 |
| ＜25 | 6.10 | 4 |
| **UACR (mg/g)** |  |  |
| ＜300（ref） |  |  |
| ≥300 | 2.21 | 2 |
| **Insulin treatment** |  |  |
| no（ref） |  |  |
| yes | 1.51 | 1.5 |

Scr was categorized as <180 and ≥180 µmol/L. Plasma AlB was categorized as ≥35, 25–35, and <25 g/L. UACR was categorized as <300 and ≥300 mg/g. After continuous variables were transformed into categorical variables, HR values were obtained through multivariate regression analysis. The score of each category of the variable was assigned according to the HR value. The final score of each variable is as follow: Scr (µmol/L; <180 scores 0 and ≥180 scores 4), plasma ALB (g/L; ≥35 scores 0, 25–35 scores 2, and <25 scores 4), UACR (mg/g; <300 scores 0 and ≥300 scores 2), insulin treatment (no scores 0 and yes scores 1.5). **Abbreviations:** HR, hazard ratio; Scr, serum creatinine; ALB, albumin; UACR, urinary albumin creatinine ratio; ref, reference.
